# Supplementary material
Source: PubMed Central journal article supplement (PMC8786140)
Supplement: 7562_3_supp_82633_qw4zp2.pdf [file 7562_3_supp_82633_qw4zp2.pdf]

## **Supplemental Material**

### **Contents:**

Supplemental table 1: Hierarchy for determining baseline reference creatinine

Supplemental table 2. Comparison of groups before and after propensity score matching

Supplemental table 3. Rehospitalization and mortality outcomes of propensity score-matched AKI rehabilitation program participants and non-participants

Supplemental table 4: Characteristics of stage 2 and stage 3 AKI patients in the AKI rehabilitation program

**Supplemental Table 1: Hierarchy for determining baseline reference creatinine.**

|              | Creatinine values available prior to admission                                                                    | Reference creatinine                                                               |
|--------------|-------------------------------------------------------------------------------------------------------------------|------------------------------------------------------------------------------------|
| Preference 1 | 3 or more outpatient values available in 365 days prior to admission (PTA)                                        | Mean of all outpatient creatinine values                                           |
| Preference 2 | 2 outpatient values available in 365 days PTA + some prior inpatient values                                       | Mean of 2 outpatient values and lowest inpatient creatinine from prior admissions  |
| Preference 3 | 1 or fewer outpatient creatinine values in 365 days PTA but more outpatient values available within 18 months PTA | Mean of any outpatient creatinine values available in 18 months prior to admission |
| Preference 4 | No outpatient creatinine values in 18 months PTA but patient had prior inpatient admissions                       | Mean of 3 lowest inpatient creatinine values over the past 18 months               |
| Preference 5 | No prior inpatient or outpatient creatinine available                                                             | Creatinine at admission or as determined by nephrologist                           |

Supplemental Table 2. Comparison of groups before and after propensity score matching

| <b>Original Cohort</b>                 |                         |                     |                                     |
|----------------------------------------|-------------------------|---------------------|-------------------------------------|
|                                        | <b>Non-participants</b> | <b>Participants</b> | <b>Standardized Mean Difference</b> |
|                                        | <b>400</b>              | <b>52</b>           |                                     |
| <b>Age</b>                             | 63.60 (17.05)           | 63.42 (14.39)       | 0.011                               |
| <b>Length of stay</b>                  | 12.89 (12.41)           | 10.06 (7.37)        | 0.277                               |
| <b>Charlson comorbidity index</b>      | 5.93 (3.82)             | 5.69 (4.08)         | 0.06                                |
| <b>Discharge eGFR</b>                  | 53.95 (34.74)           | 32.22 (25.39)       | 0.714                               |
| <b>Gender = Male n (%)</b>             | 216 (54.0)              | 30 (57.7)           | 0.074                               |
| <b>Race= White n (%)</b>               | 384 (96.0)              | 52 (100.0)          | 0.289                               |
| <b>Admissions in prior year n (%)</b>  | 6 (1.5)                 | 1 (1.9)             | 0.033                               |
| <b>Discharge disposition n (%)</b>     |                         |                     |                                     |
| <b>Home</b>                            | 187 (46.8)              | 40 (76.9)           | 0.77                                |
| <b>Rehab</b>                           | 32 (8.0)                | 4 (7.7)             |                                     |
| <b>SNF</b>                             | 134 (33.5)              | 8 (15.4)            |                                     |
| <b>Dialysis as inpatient n (%)</b>     | 36 (9.0)                | 6 (11.5)            | 0.084                               |
| <b>CHF diagnosis n (%)</b>             | 123 (30.8)              | 10 (19.2)           | 0.268                               |
| <b>ICU stay n (%)</b>                  | 205 (51.2)              | 17 (32.7)           | 0.383                               |
| <b>AKI stage= stage 3 n (%)</b>        | 131 (32.8)              | 44 (84.6)           | 1.239                               |
| <b>After propensity score matching</b> |                         |                     |                                     |
|                                        | <b>Non-participants</b> | <b>Participants</b> | <b>Standardized Mean Difference</b> |
|                                        | <b>45</b>               | <b>45</b>           |                                     |
| <b>Age</b>                             | 62.76 (15.41)           | 63.69 (14.99)       | 0.061                               |
| <b>Length of stay</b>                  | 11.93 (9.34)            | 10.53 (7.77)        | 0.163                               |
| <b>Charlson comorbidity index</b>      | 5.58 (3.35)             | 5.89 (4.33)         | 0.08                                |
| <b>Discharge eGFR</b>                  | 37.93 (29.50)           | 35.01 (26.14)       | 0.105                               |
| <b>Gender = Male n (%)</b>             | 29 (64.4)               | 25 (55.6)           | 0.182                               |
| <b>Race= White (%)</b>                 | 45 (100.0)              | 45 (100.0)          | <0.001                              |
| <b>Admissions in prior year (%)</b>    | 0 (0.0)                 | 1 (2.2)             | 0.213                               |
| <b>Discharge disposition (%)</b>       |                         |                     |                                     |
| <b>Home</b>                            | 31 (68.9)               | 33 (73.3)           | 0.113                               |
| <b>Rehab</b>                           | 4 (8.9)                 | 4 (8.9)             |                                     |
| <b>SNF</b>                             | 10 (22.2)               | 8 (17.8)            |                                     |
| <b>Dialysis as inpatient n (%)</b>     | 7 (15.6)                | 6 (13.3)            | 0.063                               |
| <b>CHF diagnosis n (%)</b>             | 5 (11.1)                | 9 (20.0)            | 0.247                               |
| <b>ICU stay n (%)</b>                  | 18 (40.0)               | 17 (37.8)           | 0.046                               |
| <b>AKI stage= stage 3 n (%)</b>        | 39 (86.7)               | 37 (82.2)           | 0.123                               |

All values indicate mean and standard deviation unless otherwise indicated

**Supplemental Table 3. Rehospitalization and mortality outcomes of propensity score-matched AKI rehabilitation program participants and non-participants**

| <b>Outcome</b>                               | <b>Participants<br/>N=45</b> | <b>Non-participants<br/>N= 45</b> | <b>p-value</b> |
|----------------------------------------------|------------------------------|-----------------------------------|----------------|
| <b>30-day rehospitalization or mortality</b> | 8 (17.8%)                    | 14 (31.1%)                        | 0.22           |
| <b>30-day rehospitalization</b>              | 7 (15.6%)                    | 12 (26.7%)                        | 0.30           |
| <b>30-day mortality</b>                      | 1 (2.2%)                     | 2 (4.4%)                          | -              |
| <b>90-day rehospitalization or mortality</b> | 21 (46.7%)                   | 26 (57.8%)                        | 0.4            |
| <b>90-day rehospitalization</b>              | 15 (33.3%)                   | 17 (37.8%)                        | 0.22           |
| <b>90-day mortality</b>                      | 3 (6.7%)                     | 7 (15.6%)                         | 0.31           |

**Supplemental Table 4: Characteristics of stage 2 and stage 3 AKI patients in the AKI rehabilitation program**

| <b>Characteristics</b>                |             | <b>Stage 3<br/>n = 44</b> | <b>Stage 2<br/>n = 8</b> |
|---------------------------------------|-------------|---------------------------|--------------------------|
| Age                                   |             | 61.6 (13.6)               | 73.5 (15.1)              |
| Gender                                |             |                           |                          |
|                                       | Female      | 16 (36%)                  | 6 (75%)                  |
|                                       | Male        | 28 (64%)                  | 2 (25%)                  |
| Race                                  |             |                           |                          |
|                                       | Caucasian   | 42 (95%)                  | 8 (100%)                 |
|                                       | Hispanic    | 2 (5%)                    |                          |
| Length of stay                        |             | 10.4 (7.5)                | 8.1 (6.5)                |
| Discharge disposition                 |             |                           |                          |
|                                       | Home        | 34 (77%)                  | 6 (75%)                  |
|                                       | Acute rehab | 4 (9%)                    | 0 (0%)                   |
|                                       | SNF         | 6(14%)                    | 2 (25%)                  |
| Charlson Comorbidity Index            |             | 4.9 (4.0)                 | 6 (3.8)                  |
| Discharge eGFR                        |             | 35.7 (25.9)               | 13.1 (7)                 |
| Inpatient dialysis/ CRRT              |             | 6 (14%)                   | 0                        |
| ICU stay during admission             |             | 16 (36%)                  | 1 (13%)                  |
| Type of admission                     |             |                           |                          |
|                                       | Medical     | 25 (57%)                  | 6 (75%)                  |
|                                       | Surgical    | 19 (43%)                  | 2 (25%)                  |
| <b>Outcomes</b>                       |             |                           |                          |
| 30-day mortality                      |             | 1 (2%)                    | 0 (0%)                   |
| 30-day rehospitalization              |             | 4 (9%)                    | 3 (38%)                  |
| 30-day mortality or rehospitalization |             | 5 (11%)                   | 3 (38%)                  |
| 90-day mortality                      |             | 3 (7%)                    | 0 (0%)                   |
| 90-day rehospitalization              |             | 11 (25%)                  | 4 (50%)                  |
| 90-day mortality or rehospitalization |             | 12 (27%)                  | 4 (50%)                  |
